# Supplementary material for: Solar Light-Irradiated Photocatalytic Degradation of Model Dyes and Industrial Dyes by a Magnetic CoFe2O4–gC3N4 S-Scheme Heterojunction Photocatalyst
Source: PubMed Central journal article supplement — ACS Omega. 2021 Feb 5;6(7):4831–41. doi: 10.1021/acsomega.0c05809 (PMC7905952; doi:10.1021/acsomega.0c05809), 2021-02-05
Supplement: ao0c05809_si_001.pdf [file ao0c05809_si_001.pdf]

## *Supporting Information*

# **Solar Light Irradiated Photocatalytic Degradation of Model Dyes and Industrial Dyes by a Magnetic $\text{CoFe}_2\text{O}_4\text{-gC}_3\text{N}_4$ S-Scheme Heterojunction Photocatalyst**

*Debika Gogoi, Priyanka Makkar, Narendra Nath Ghosh\**

Nano-materials Lab, Department of Chemistry, Birla Institute of Technology and Science, Pilani  
K K Birla Goa Campus, Goa-403726, India

\*Corresponding author. Tel. /fax: +91 832 2580318/25570339.

\*E-mail address: naren70@yahoo.com (N. N. Ghosh)

Author's email addresses: [p20180429@goa.bits-pilani.ac.in](mailto:p20180429@goa.bits-pilani.ac.in) (Debika Gogoi),

[priyankamakkar1991@gmail.com](mailto:priyankamakkar1991@gmail.com) (Priyanka Makkar)

## 1. Details of Chemicals

Cobalt Nitrate  $\text{Co}(\text{NO}_3)_2 \cdot 6\text{H}_2\text{O}$  (Merck, India), Ferric Nitrate  $\text{Fe}(\text{NO}_3)_3 \cdot 9\text{H}_2\text{O}$  (Fisher Scientific), polyethylene glycol (PEG-400) (Fisher Scientific), Sodium Hydroxide (NaOH) (Fisher Scientific) were used for the synthesis of  $\text{CoFe}_2\text{O}_4$  nanoparticles. Melamine (Molychem) was used for the synthesis of graphitic carbon nitride ( $\text{gC}_3\text{N}_4$ ). Other chemicals used were 30%  $\text{H}_2\text{O}_2$  (Merck, India), Methylene Blue (Fisher Scientific), Methyl Orange (Fisher Scientific), Congo Red (Loba Chemie Pvt. Ltd.), Drimaren Turquoise CL-B p (Archroma), Drimaren Yellow CL-2R p (Archroma) and Drimaren Red CL-5B p (Archroma). De-ionized water was used for all the experiments and all the chemicals were used as purchased without further purification.

## 2. Details of Instruments

The synthesized materials were characterized by- X-ray diffraction (XRD) by using a powder X-ray diffractometer (Mini Flex II, Rigaku, Japan) with  $\text{Cu K}\alpha$  ( $\lambda=0.154$  nm), thermogravimetric analysis (TGA) by using a DTA-60 (Shimadzu, Japan), Field Emission Scanning Electron Microscopy (FESEM) by using Quanta 250 FEG (FEI), Energy Dispersive X-ray Spectra (EDS) by using an EDAX ELEMENT electron microscope, Fourier Transform Infrared (FT-IR) spectroscopy by using an FT-IR spectrophotometer (IR Affinity-1, Shimadzu, Japan), Raman spectroscopy by using a Horiba via Raman microscope with a 532 nm laser excitation and UV-Vis diffuse reflectance spectroscopy (DRS) by using a JASCO V-770 spectrophotometer. A 150 W Xenon lamp (400-1000 nm) was used as an irradiation source. OCT-L TOC analyser (Shimadzu, Japan) was used to determine the TOC removal ratio of dye solutions.

**Table S1.** Comparison of photocatalytic efficiency of 50CF-50gC<sub>3</sub>N<sub>4</sub> with other gC<sub>3</sub>N<sub>4</sub> based photocatalyst.

| S. No. | Photocatalyst                                                                      | Catalyst dose (g L <sup>-1</sup> ) | Dye Used   | Conc. of dye solution (ppm) | Irradiation Source Xe lamp (W) | Degradation % | Time (h) | Reference       |
|--------|------------------------------------------------------------------------------------|------------------------------------|------------|-----------------------------|--------------------------------|---------------|----------|-----------------|
| 1      | gC <sub>3</sub> N <sub>4</sub> -Bi <sub>2</sub> WO <sub>6</sub>                    | 1                                  | MO         | 5                           | 300                            | 93%           | 2        | 33              |
| 2      | BaTiO <sub>3</sub> @gC <sub>3</sub> N <sub>4</sub>                                 | 0.5                                | MO         | 5                           | 200                            | 76%           | 6        | 79              |
| 3      | gC <sub>3</sub> N <sub>4</sub> -Bi <sub>2</sub> MoO <sub>6</sub>                   | 1                                  | MO         | 5                           | 300                            | 100%          | 2        | 80              |
| 4      | MnFe <sub>2</sub> O <sub>4</sub> /gC <sub>3</sub> N <sub>4</sub> /TiO <sub>2</sub> | 0.5                                | MO         | 10                          | 150                            | 99.27 %       | 3        | 71              |
| 5      | ZnAl <sub>2</sub> O <sub>4</sub> /g-C <sub>3</sub> N <sub>4</sub>                  | 1                                  | MO         | 10                          | 500                            | 96%           | 2        | 81              |
| 6      | gC <sub>3</sub> N <sub>4</sub> -BiVO <sub>4</sub>                                  | 1                                  | MO         | 5                           | 300                            | ~80%          | 2        | 82              |
|        |                                                                                    |                                    | MB         | 10                          |                                | 94%           | 1.5      |                 |
| 7      | gC <sub>3</sub> N <sub>4</sub> /ZnWO <sub>4</sub>                                  | 0.5                                | MB         | 3                           | 500                            | 94.1%         | 3        | 83              |
| 8      | Graphene/gC <sub>3</sub> N <sub>4</sub>                                            | 3                                  | MB         | 0.2                         | 300                            | 77%           | 1.66     | 84              |
| 9      | PANI-gC <sub>3</sub> N <sub>4</sub>                                                | 2                                  | MB         | 10                          | 500                            | 92.8%         | 2        | 40              |
| 10     | gC <sub>3</sub> N <sub>4</sub> -TiO <sub>2</sub> @PANI                             | 0.2                                | CR         | 20                          | Solar light (12450-13174 Lux)  | 100%          | 3        | 85              |
| 11     | SiO <sub>2</sub> /gC <sub>3</sub> N <sub>4</sub>                                   | 2                                  | CR         | 60                          | 500                            | ~90%          | 6        | 86              |
| 12     | BN/gC <sub>3</sub> N <sub>4</sub>                                                  | 0.5                                | CR         | 20                          | 350                            | 91.9%         | 1.5      | 87              |
| 13     | 50CF-50gC <sub>3</sub> N <sub>4</sub>                                              | 0.5                                | MB         | 25                          | 150                            | ~100%         | 0.75     | <b>Our work</b> |
| 14     | 50CF-50gC <sub>3</sub> N <sub>4</sub>                                              | 1                                  | MO         | 10                          | 150                            | ~100%         | 1.5      | <b>Our work</b> |
| 15     | 50CF-50gC <sub>3</sub> N <sub>4</sub>                                              | 0.5                                | CR         | 25                          | 150                            | ~100%         | 1.5      | <b>Our work</b> |
| 16     | 50CF-50gC <sub>3</sub> N <sub>4</sub>                                              | 0.5                                | Turq CL-B  | 25                          | 150                            | ~100%         | 1.5      | <b>Our work</b> |
| 17     | 50CF-50gC <sub>3</sub> N <sub>4</sub>                                              | 0.5                                | Yell CL-2R | 25                          | 150                            | ~100%         | 0.75     | <b>Our work</b> |
| 18     | 50CF-50gC <sub>3</sub> N <sub>4</sub>                                              | 0.5                                | Red CL-5B  | 25                          | 150                            | ~100%         | 1        | <b>Our work</b> |

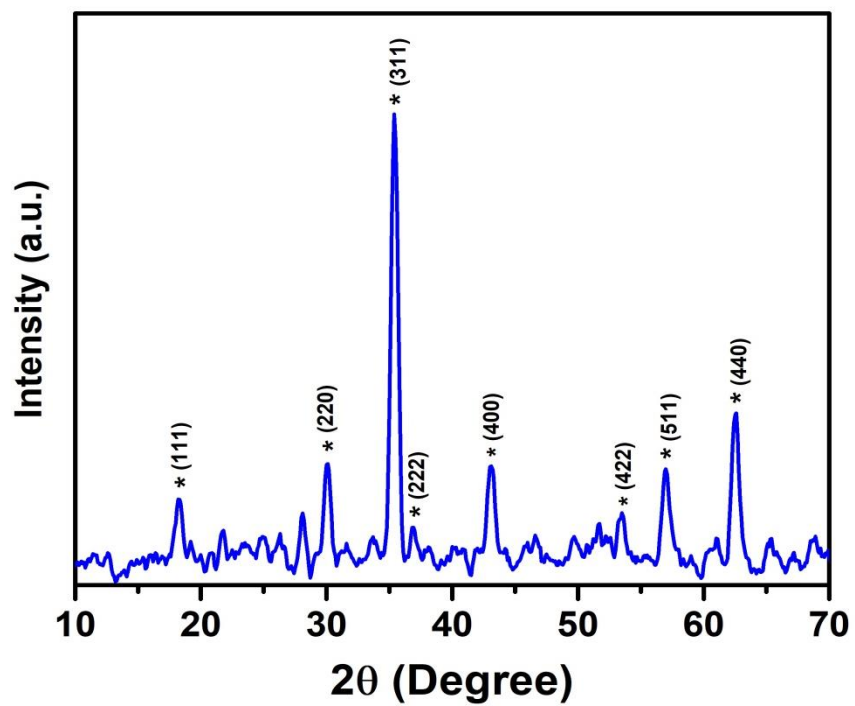

**Figure S1.** XRD patterns of pure  $\text{CoFe}_2\text{O}_4$ .

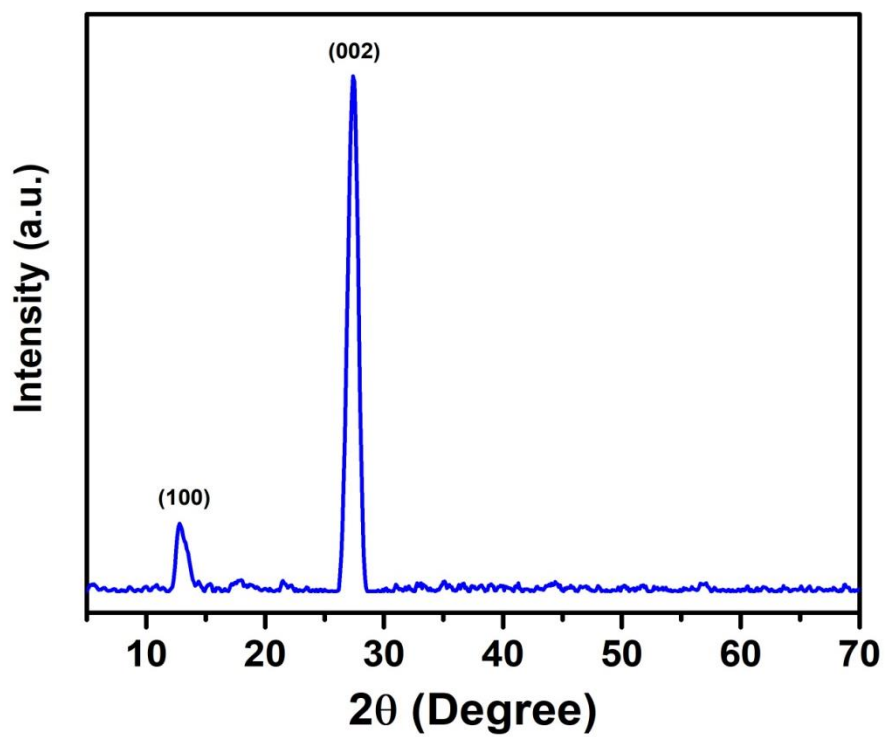

**Figure S2.** XRD patterns of pure  $\text{gC}_3\text{N}_4$ .

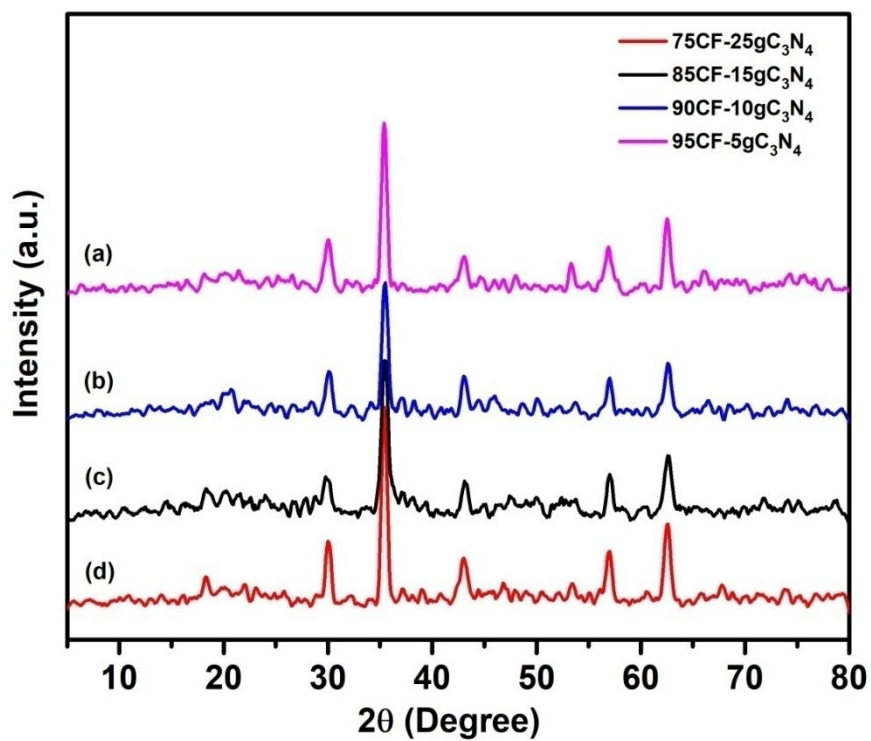

**Figure S3.** XRD patterns of (a) 95CF-5gC<sub>3</sub>N<sub>4</sub>, (b) 90CF-10gC<sub>3</sub>N<sub>4</sub>, (c) 85CF-15gC<sub>3</sub>N<sub>4</sub> and (d) 75CF-25gC<sub>3</sub>N<sub>4</sub>.

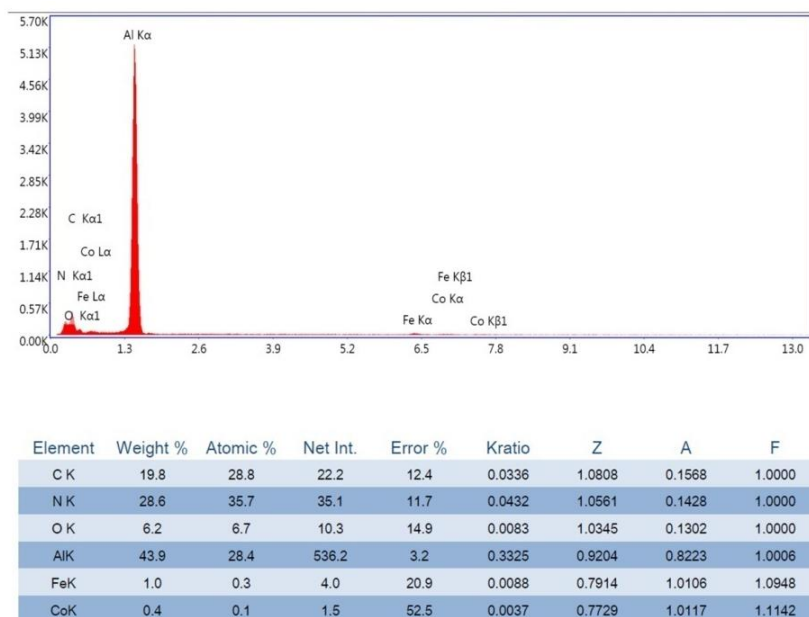

**Figure S4.** EDS of 50CF-50gC<sub>3</sub>N<sub>4</sub>.

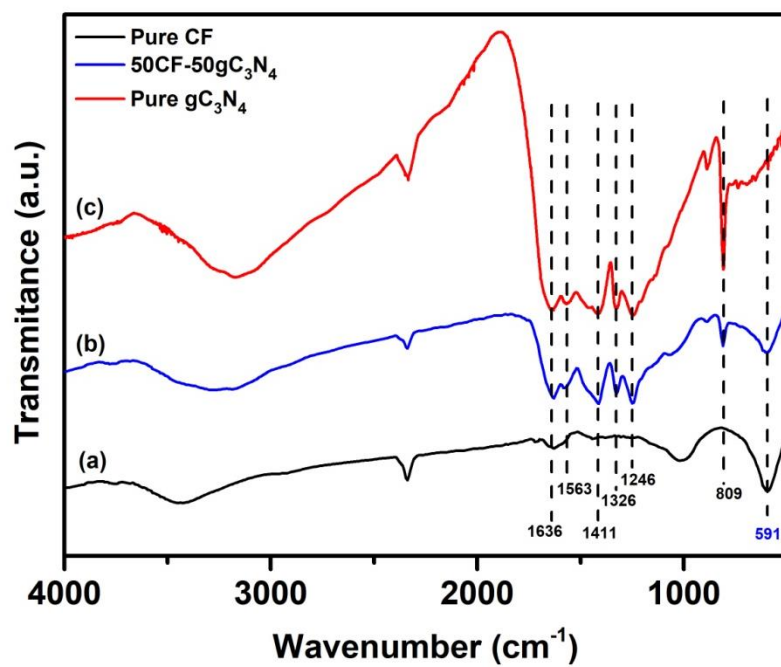

**Figure S5.** FT-IR spectra of (a) CF, (b) 50CF-50gC<sub>3</sub>N<sub>4</sub> and (c) gC<sub>3</sub>N<sub>4</sub>.

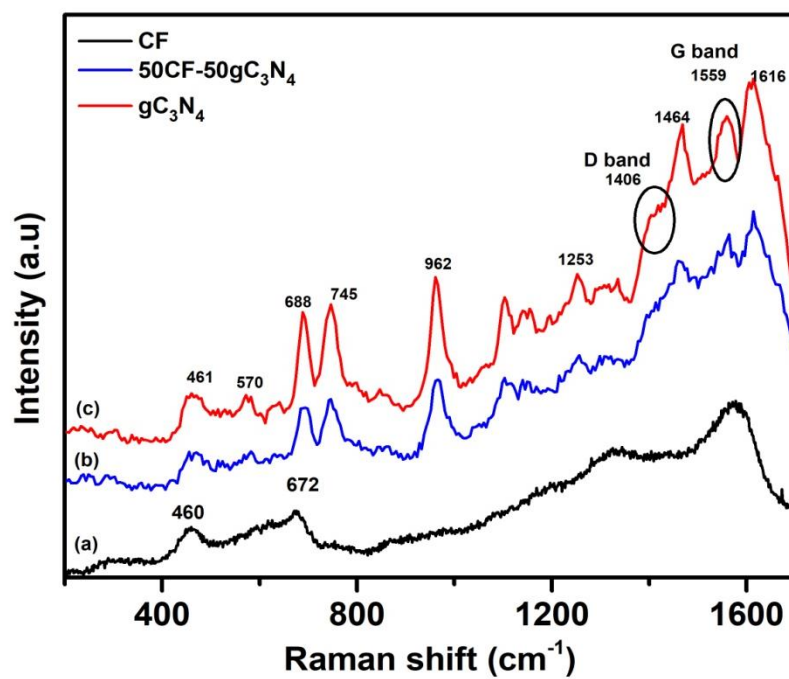

**Figure S6.** Raman spectra of (a) CF, (b) 50CF-50gC<sub>3</sub>N<sub>4</sub> and (c) gC<sub>3</sub>N<sub>4</sub>.

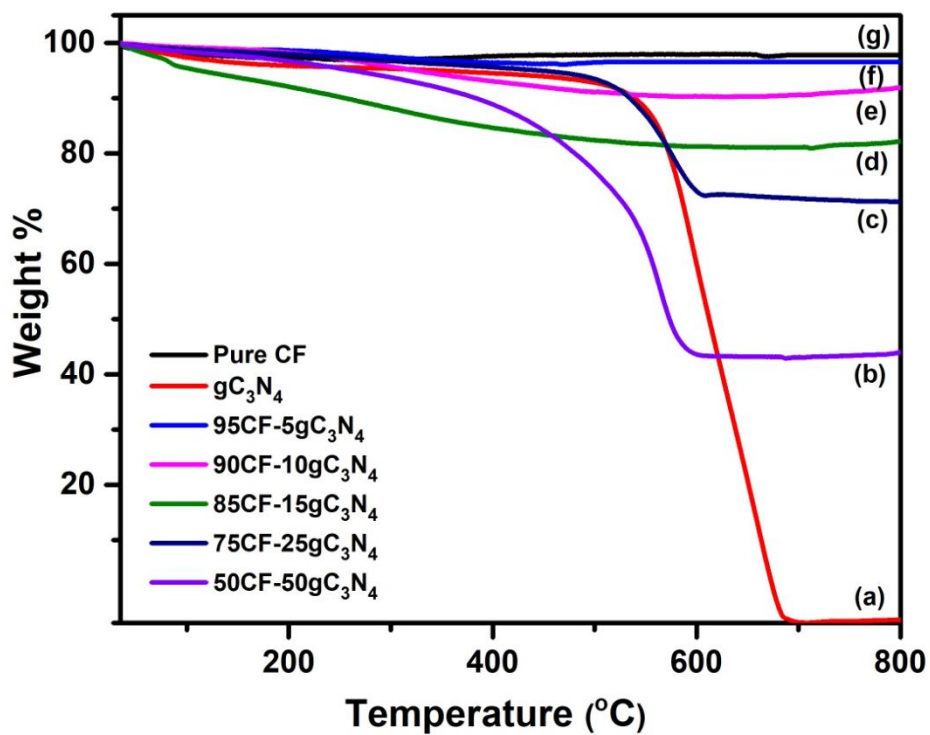

**Figure S7.** TGA curves of (a) Pure gC<sub>3</sub>N<sub>4</sub>, (b) 50CF-50gC<sub>3</sub>N<sub>4</sub>, (c) 75CF-25gC<sub>3</sub>N<sub>4</sub>, (d) 85CF-15gC<sub>3</sub>N<sub>4</sub>, (e) 90CF-10gC<sub>3</sub>N<sub>4</sub>, (f) 95CF-5gC<sub>3</sub>N<sub>4</sub> and (g) Pure CF in the temperature range 35°C-800°C.

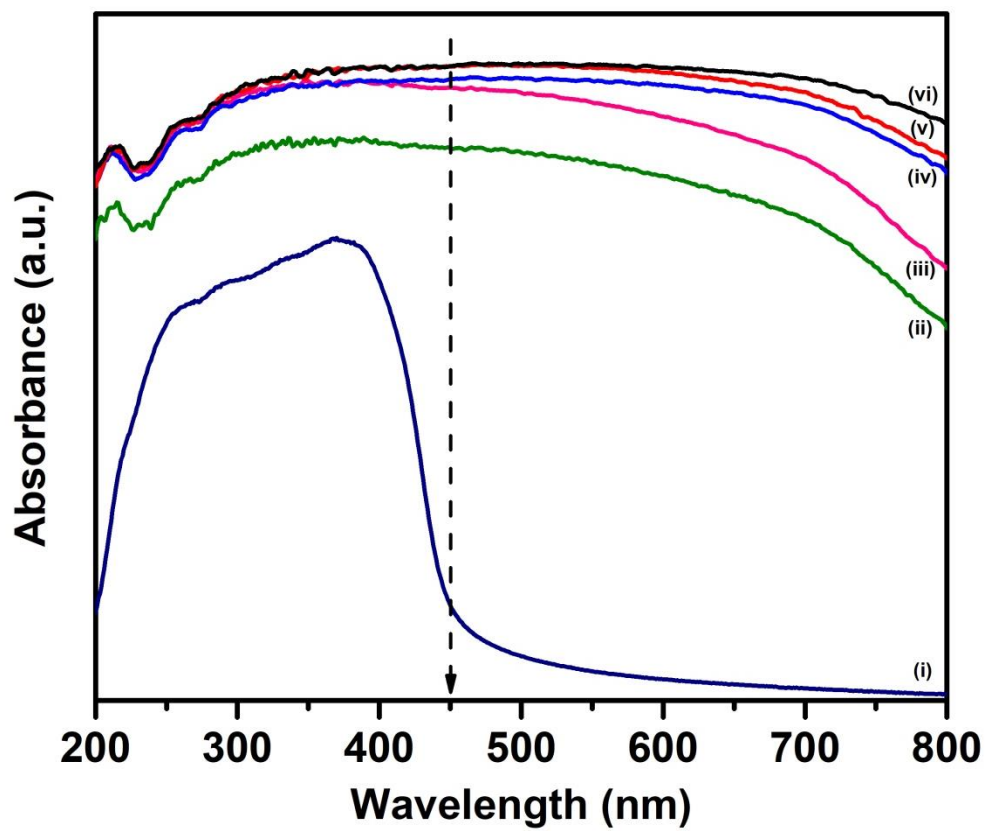

**Figure S8.** UV-Vis diffuse absorption spectra of (i) Pure  $gC_3N_4$ , (ii) 50CF-50 $gC_3N_4$ , (iii) 75CF-25 $gC_3N_4$ , (iv) 85CF-15 $gC_3N_4$ , (v) 90CF-10 $gC_3N_4$ , and (vi) 95CF-5 $gC_3N_4$ .



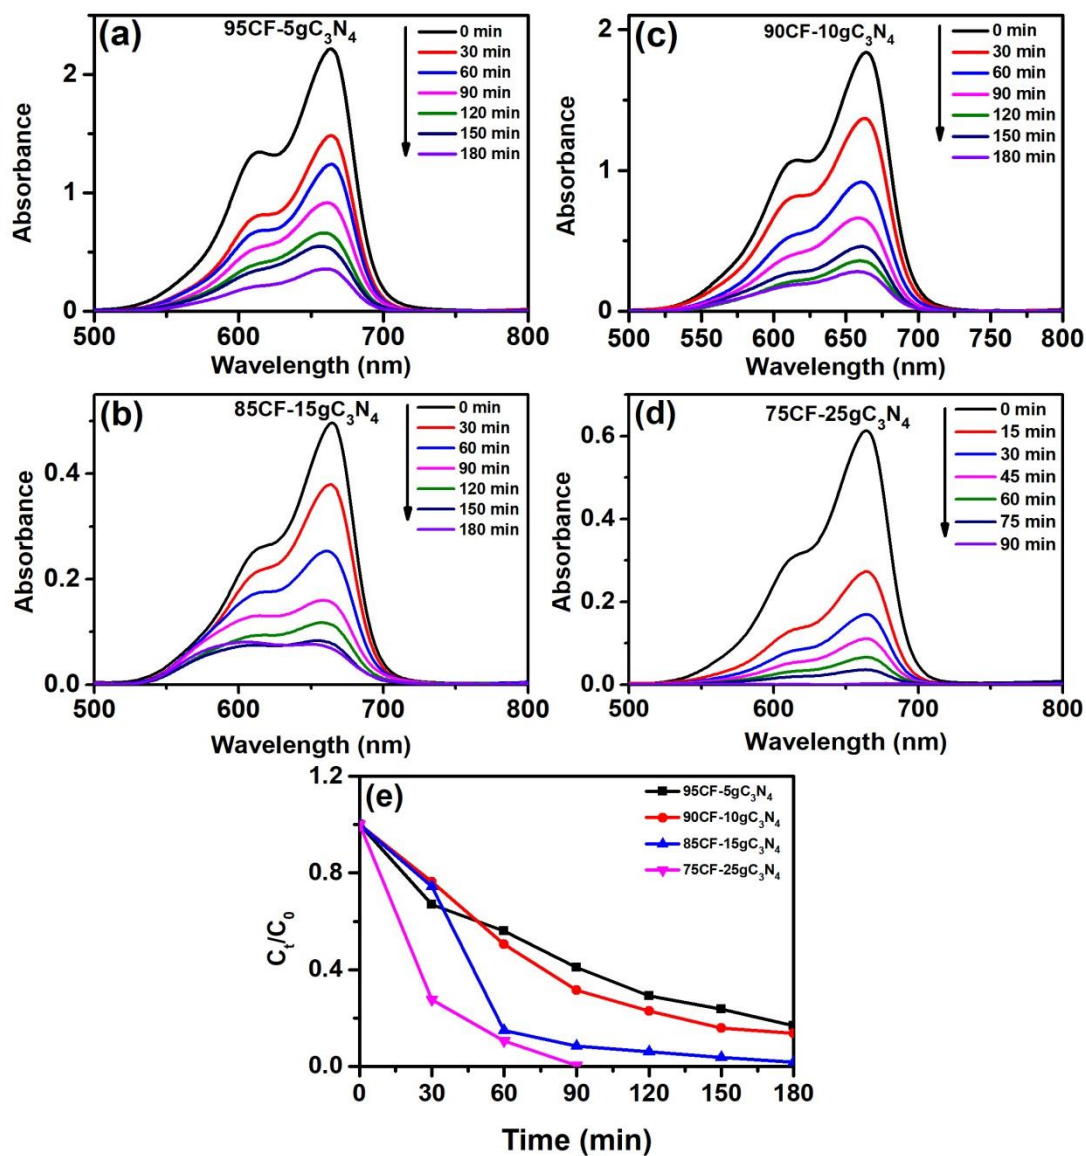

**Figure S9.** (a-d) Time dependent UV-Vis spectral changes of photodecomposition reaction of MB catalysed by different CF-gC<sub>3</sub>N<sub>4</sub> nanocomposites (e) Photodegradation rates of the MB catalysed by different CF-gC<sub>3</sub>N<sub>4</sub> nanocomposites.

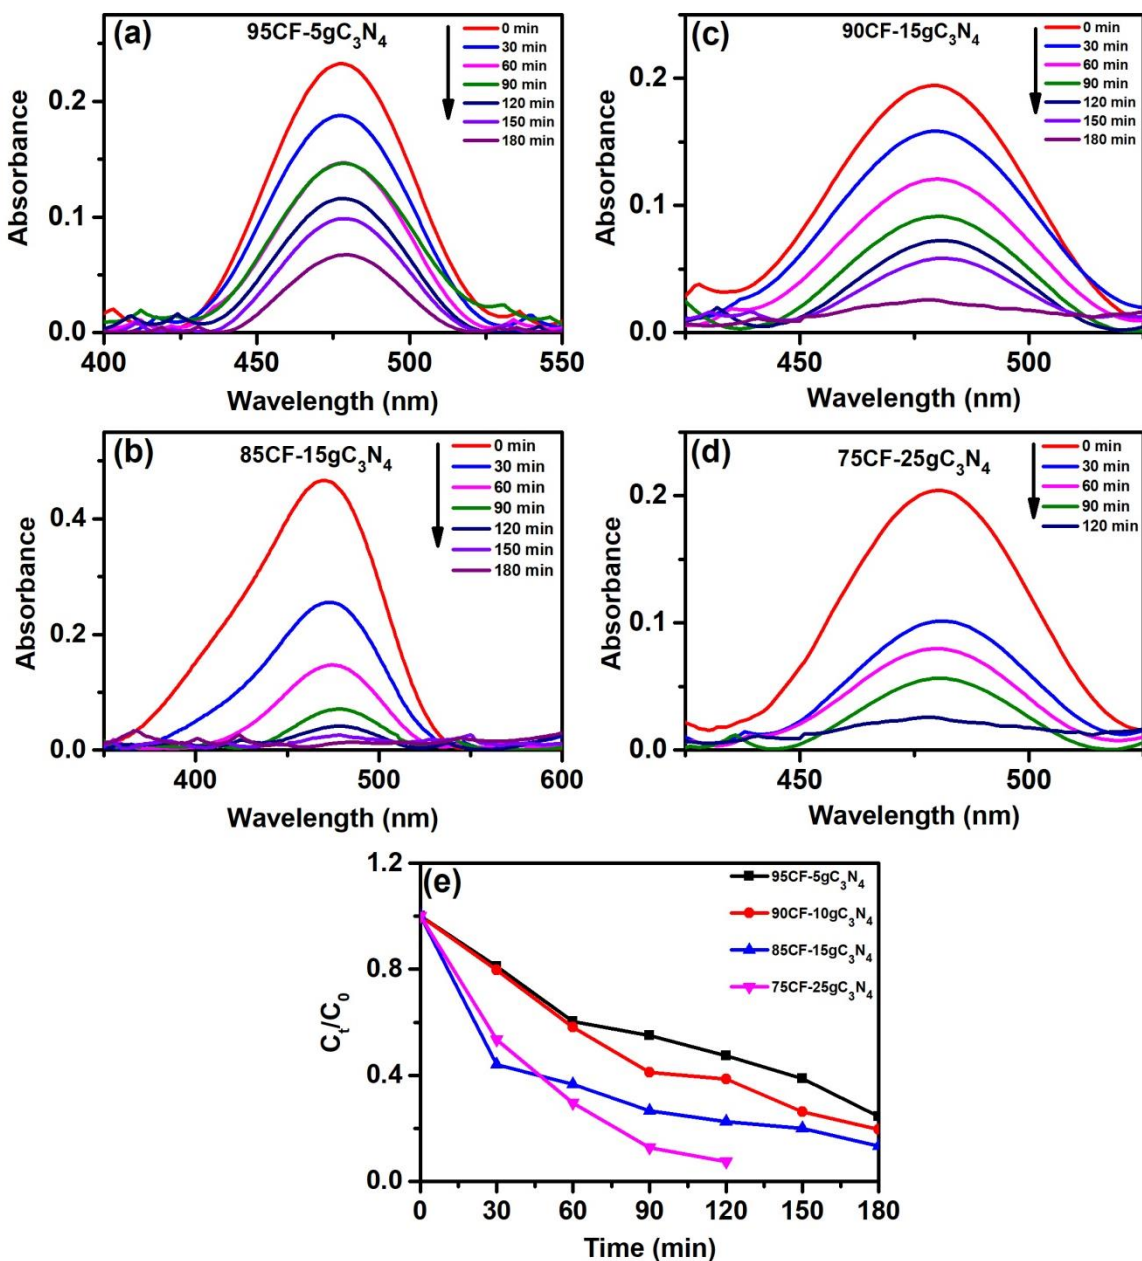

**Figure S10.** (a-d) Time dependent UV-Vis spectral changes of photodecomposition reaction of MO catalysed by different CF- $gC_3N_4$  nanocomposites (e) Photodegradation rates of the MO catalysed by different CF- $gC_3N_4$  nanocomposites.

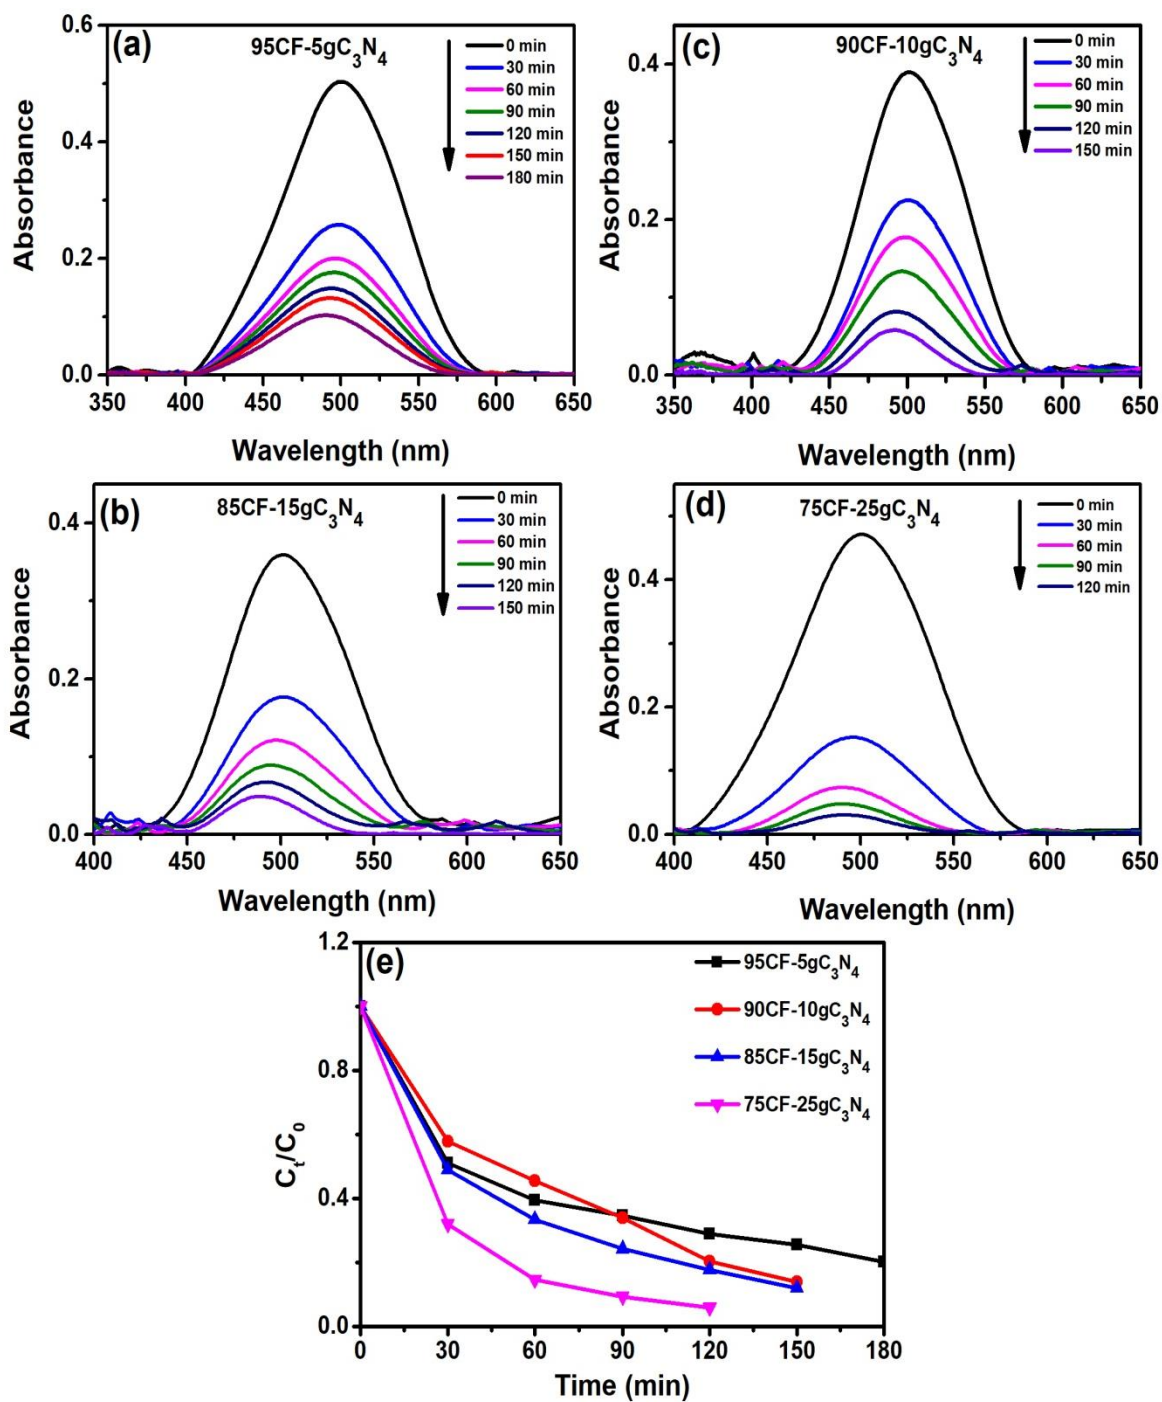

**Figure S11.** (a-d) Time dependent UV-Vis spectral changes of photodecomposition reaction of CR catalysed by different CF-gC<sub>3</sub>N<sub>4</sub> nanocomposites (e) Photodegradation rates of the CR catalysed by different CF-gC<sub>3</sub>N<sub>4</sub> nanocomposites.

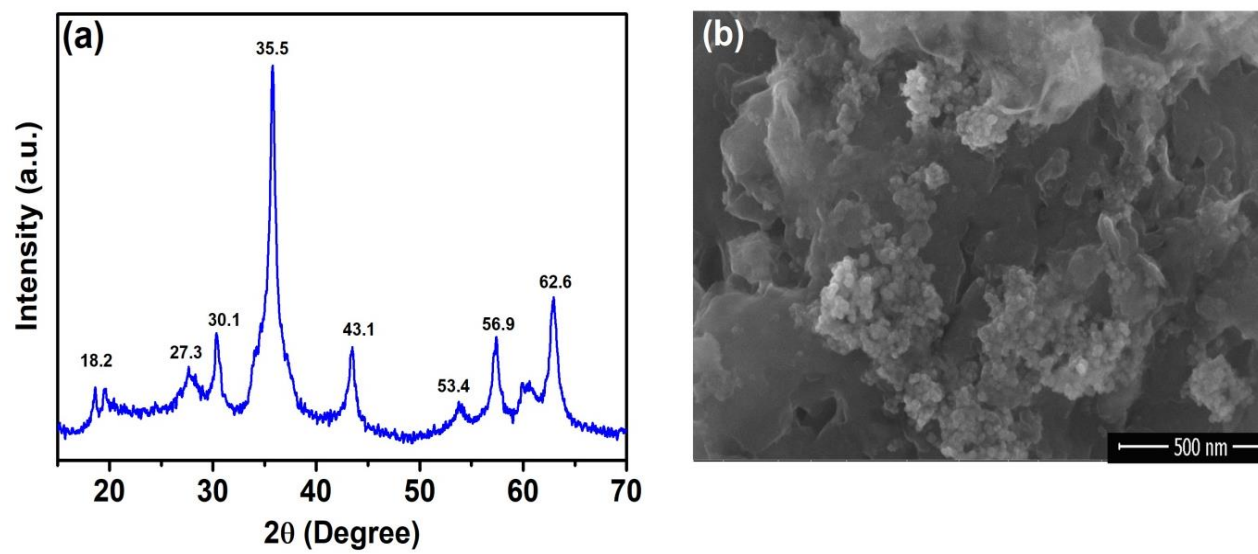

**Figure S12.** (a) XRD plot, (b) FESEM image of the used 50CF-50gC<sub>3</sub>N<sub>4</sub> catalyst.
